# Supplementary material
Source: HighWire-hosted journal article supplement (https://cmaj.ca/highwire/filestream/99472/field_highwire_adjunct_files/2/210873-res-3-at.pdf)
Supplement: 210873-res-3-at.pdf [file 210873-res-3-at.pdf]

Supplementary Figure 1 - Directed acyclic graph (DAG) showing risk factors for A. ICU admission and B. cardiac involvement

A.

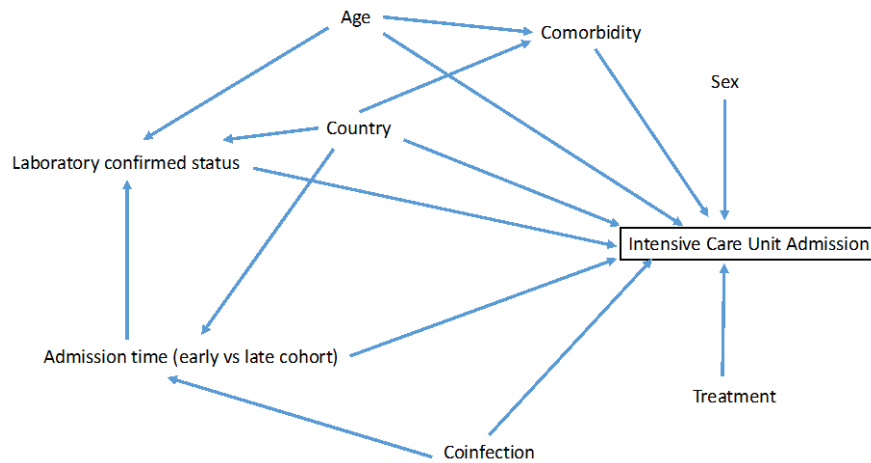

B.

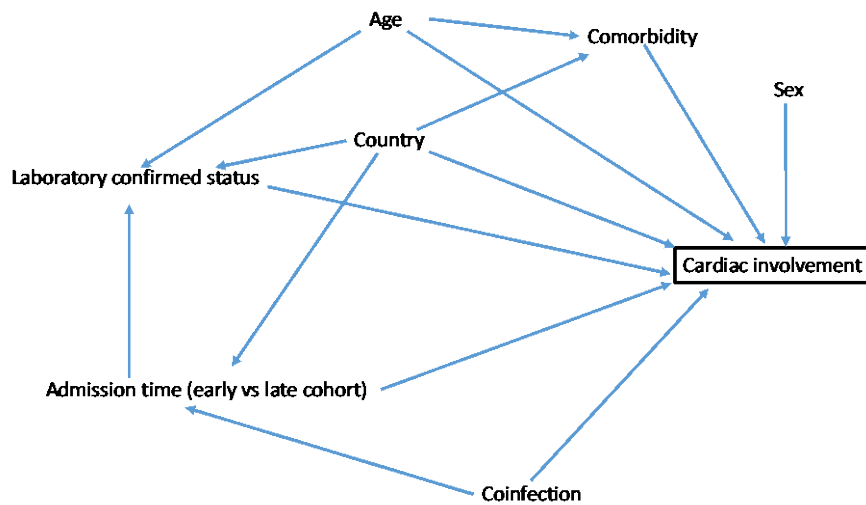

Legend: Admission time: Nov 1, 2020 – Mar 7, 2021 versus admitted Mar 1, 2020 - Oct 31, 2021. B: Cardiac involvement: Echocardiographic evidence of pericarditis, valvulitis, coronary vessel abnormalities, or biochemical evidence with troponin >0.5 pg/ml or NT-proB-type Natriuretic Peptide (BNP) >100 pg/ml
